# Supplementary material for: Rapamycin enhances BCG-specific γδ T cells during intravesical BCG therapy for non-muscle invasive bladder cancer: a randomized, double-blind study
Source: PubMed Central journal article supplement — J Immunother Cancer. 2021 Mar 2;9(3):e001941. doi: 10.1136/jitc-2020-001941 (PMC7929866; doi:10.1136/jitc-2020-001941), 2021-03-02
Supplement: jitc-2020-001941supp001.pdf [file jitc-2020-001941supp001.pdf]

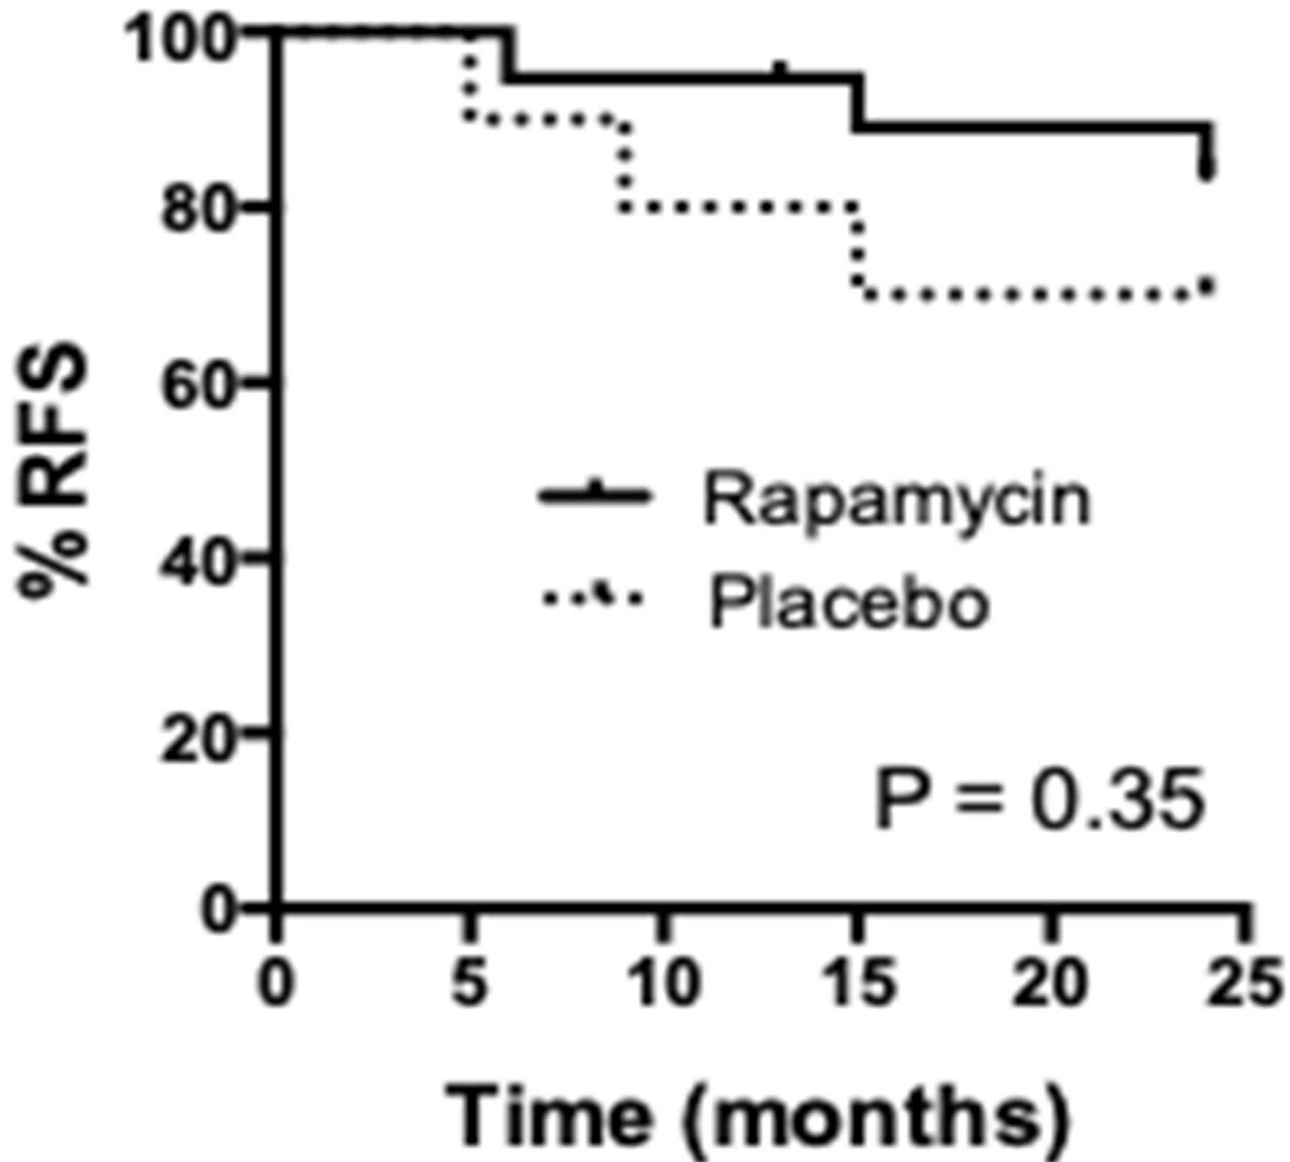

**fig. S1.** Recurrence free survival (RFS) of 2-year follow-up in patients treated with rapamycin (0.5 or 2.0 mg) vs placebo group.
