# Supplementary material for: Rapamycin enhances BCG-specific γδ T cells during intravesical BCG therapy for non-muscle invasive bladder cancer: a randomized, double-blind study
Source: PubMed Central journal article supplement — J Immunother Cancer. 2021 Mar 2;9(3):e001941. doi: 10.1136/jitc-2020-001941 (PMC7929866; doi:10.1136/jitc-2020-001941), 2021-03-02
Supplement: jitc-2020-001941supp002.pdf [file jitc-2020-001941supp002.pdf]

table S1. Complications at any time throughout 90 days of study

| Patient No.               | Rapamycin Whole Blood Levels (ng/mL) | Grade of Complication (CTCAE version 5.0)                                                        |                                                    |                | AE Related to Study Drug (Y/N) |
|---------------------------|--------------------------------------|--------------------------------------------------------------------------------------------------|----------------------------------------------------|----------------|--------------------------------|
|                           |                                      | 1 (Mild)                                                                                         | 2 (Moderate)                                       | 3 (Severe)     |                                |
| <b>Placebo</b>            |                                      |                                                                                                  |                                                    |                |                                |
| 006                       | 0                                    |                                                                                                  |                                                    |                |                                |
| 007                       | 0                                    |                                                                                                  |                                                    |                |                                |
| 008                       | 1.20                                 |                                                                                                  | Dysuria, UTI                                       |                | N                              |
| 009                       | 0                                    | Lightheaded, fatigue                                                                             |                                                    |                | N                              |
| 012                       | 0                                    | Constipation                                                                                     |                                                    |                | N                              |
| 020                       | -                                    | Dysuria                                                                                          | Hand, arm, mouth numbness <sup>#</sup>             |                | Y <sup>#</sup>                 |
| 024                       | 0                                    |                                                                                                  |                                                    |                |                                |
| 025                       | 0                                    |                                                                                                  |                                                    |                |                                |
| 027                       | 0                                    | Rash behind knees, hematuria, cold symptoms                                                      |                                                    |                | N                              |
| 030                       | 0                                    |                                                                                                  |                                                    |                |                                |
| 031                       | 0                                    |                                                                                                  |                                                    | Broken wrists* | N                              |
| <b>Rapamycin (0.5 mg)</b> |                                      |                                                                                                  |                                                    |                |                                |
| 003                       | 13.50                                |                                                                                                  |                                                    |                |                                |
| 004                       | 1.57                                 |                                                                                                  |                                                    |                |                                |
| 011                       | 1.26                                 | Dysuria, frequency, urgency, incontinence                                                        |                                                    |                | N                              |
| 014                       | 5.01                                 |                                                                                                  |                                                    |                |                                |
| 016                       | 1.65                                 |                                                                                                  | Hematuria, dysuria, fever, coughing, low O2 levels |                | N                              |
| 017                       | 3.00                                 | Vomiting, diarrhea                                                                               |                                                    |                | N                              |
| 019                       | 2.91                                 | Dysuria, toothache                                                                               |                                                    |                | N                              |
| 023                       | 2.21                                 |                                                                                                  |                                                    |                |                                |
| 026                       | 5.03                                 | Hematuria, diarrhea                                                                              |                                                    |                | N                              |
| 028                       | 2.09                                 | Fever, dysuria, frequency, skin sensitivity, bladder spasms, straining to urinate, urethral pain |                                                    |                |                                |
| 032                       | -                                    | Flu-like symptoms                                                                                |                                                    |                | N                              |
| 033                       | 2.32                                 | Urgency, frequency, fever w/ chills, dysuria, vomiting                                           |                                                    |                | N                              |
| <b>Rapamycin (2.0 mg)</b> |                                      |                                                                                                  |                                                    |                |                                |
| 001                       | 1.90                                 |                                                                                                  | Cough, dysuria, frequency, urgency                 |                | N                              |
| 010                       | 12.60                                | Muscle pain & fatigue, feet swelling, urgency, dysuria, fatigue                                  |                                                    |                | N                              |
| 013                       | 4.21                                 |                                                                                                  |                                                    |                |                                |
| 015                       | 1.84                                 | Discharge, dysuria                                                                               |                                                    |                | N                              |
| 018                       | 10.70                                | Diarrhea, sinus/allergy symptoms, urgency                                                        |                                                    |                | N                              |
| 021                       | -                                    | Vomiting, diarrhea, peripheral edema                                                             |                                                    |                | N                              |
| 022                       | -                                    | Chills                                                                                           | Mouth soreness, lower lip swelling <sup>#</sup>    |                | Y <sup>#</sup>                 |
| 029                       | 1.21                                 | Hematuria, dysuria, frequency, urgency, mouth ulcers, abdominal cramps                           |                                                    |                | Y <sup>^</sup>                 |

#Discontinued from the study after the onset of these symptoms

<sup>^</sup>Discontinued study drug but remained in trial

\*Severe AE requiring hospitalization but not related to the study drug

Abbreviations: CTCAE, Common Terminology Criteria for Adverse Events; ng, nanograms; mg, milligrams
