# Supplementary material for: Rapamycin enhances BCG-specific γδ T cells during intravesical BCG therapy for non-muscle invasive bladder cancer: a randomized, double-blind study
Source: PubMed Central journal article supplement — J Immunother Cancer. 2021 Mar 2;9(3):e001941. doi: 10.1136/jitc-2020-001941 (PMC7929866; doi:10.1136/jitc-2020-001941), 2021-03-02
Supplement: jitc-2020-001941supp003.pdf [file jitc-2020-001941supp003.pdf]

**table S2. Quantitative summary of adverse event incidence among all groups**

| Adverse Events                          | Placebo |         | Rapamycin (0.5 mg) |         | Rapamycin (2.0 mg) |         |
|-----------------------------------------|---------|---------|--------------------|---------|--------------------|---------|
|                                         | Grade 1 | Grade 2 | Grade 1            | Grade 2 | Grade 1            | Grade 2 |
| Voiding Dysfunction                     | 0       | 0       | 8                  | 0       | 4                  | 2       |
| Voiding/Sexual Pain or Infection        | 1       | 2       | 5                  | 1       | 6                  | 1       |
| Hematuria                               | 1       | 0       | 1                  | 1       | 1                  | 0       |
| Flu-like/<br>Other Syndromes            | 3       | 0       | 3                  | 3       | 4                  | 1       |
| Gastrointestinal                        | 1       | 0       | 4                  | 0       | 2                  | 0       |
| Paresthesia                             | 0       | 1       | 0                  | 0       | 0                  | 0       |
| Allergic/<br>Dermatologic               | 1       | 0       | 1                  | 0       | 1                  | 0       |
| Pain (not urologic or gastrointestinal) | 0       | 0       | 1                  | 0       | 0                  | 1       |
| Peripheral Edema                        | 0       | 0       | 0                  | 0       | 2                  | 1       |

Patients could have experienced more than one adverse event (AE). There was one grade 3 AE in the placebo group (broken wrist) not related to the study drug. There were no grade 4 or 5 AEs in any group. Five placebo, three Rapamycin 0.5 mg, and zero Rapamycin 2.0 mg patients reported no AEs. Grade 1 indicates mild (such as minimal hematuria or urinary frequency that resolved either without treatment or with temporary changes of behavior such as drinking more fluid or reducing activity); grade 2, moderate (such as symptomatic bacteriuria treated with an oral antibiotic); grade 3, severe (such as hematuria which required hospitalization for catheter irrigation); grade 4, life threatening/disabling; and grade 5, death.
